# Supplementary material
Source: publisher site journal article supplement (https://www.dovepress.com/article/262594)

Appendix. Chest CT scans and brain MRI findings during the whole treatment. **A, Chest CT scans.** A1, October. 25<sup>th</sup>, 2014; A2, March 24<sup>th</sup>, 2015; A3, July 27<sup>th</sup>, 2015; A4, September 28<sup>th</sup>, 2015; A5, December 10<sup>th</sup>, 2015; A6, January 8<sup>th</sup>, 2016; A7, March 4<sup>th</sup>, 2016; A8, May 20<sup>th</sup>, 2016, A9, May 20<sup>th</sup>, 2016; A10, August 2<sup>nd</sup>, 2016; A11, September 7<sup>th</sup>, 2016; A12, October 25<sup>th</sup>, 2016; A13, December 19<sup>th</sup>, 2016; A14, February 11<sup>th</sup>, 2017; A15, March 30<sup>th</sup>, 2017; A16, May 21<sup>th</sup>, 2017; A17, August 26<sup>th</sup>, 2017; A18, November 19<sup>th</sup>, 2017; A19, January 8<sup>th</sup>, 2018; A20, February 26<sup>th</sup>, 2018; A21, May 3<sup>rd</sup>, 2018; A22, March 30<sup>th</sup>, 2017; A23, May 21<sup>th</sup>, 2017; A24, August 26<sup>th</sup>, 2017; A25, November 19<sup>th</sup>, 2017; A26, January 8<sup>th</sup>, 2018; A27, February 26<sup>th</sup>, 2018; A28, May 3<sup>rd</sup>, 2018; A29, July 20<sup>th</sup>, 2018; A30, September 19<sup>th</sup>, 2018; A31, November 19<sup>th</sup>, 2018; A32, January 14<sup>th</sup>, 2019; A33, April 23<sup>th</sup>, 2019; A34, December 23<sup>th</sup>, 2019; A35, March 10<sup>th</sup>, 2020; A36, July 20<sup>th</sup>, 2018; A37, September 19<sup>th</sup>, 2018; A38, November 19<sup>th</sup>, 2018; A39, January 14<sup>th</sup>, 2019; A40, April 23<sup>th</sup>, 2019; A41, December 23<sup>th</sup>, 2019; A42, March 10<sup>th</sup>, 2020. **B, brain MRI.** B1, March 24<sup>th</sup>, 2015; B2, September 23<sup>th</sup>, 2016; B3, November 8<sup>th</sup>, 2016; B4, August 28<sup>th</sup>, 2017; B5, January 28<sup>th</sup>, 2018; B6, March 18<sup>th</sup>, 2018; B7, May 3<sup>rd</sup>, 2018; B8, January 15<sup>th</sup>, 2019; B9, April 25<sup>th</sup>, 2019; B10, December 24<sup>th</sup>, 2019. **C, cervical MRI** on March 12<sup>th</sup>, 2020.

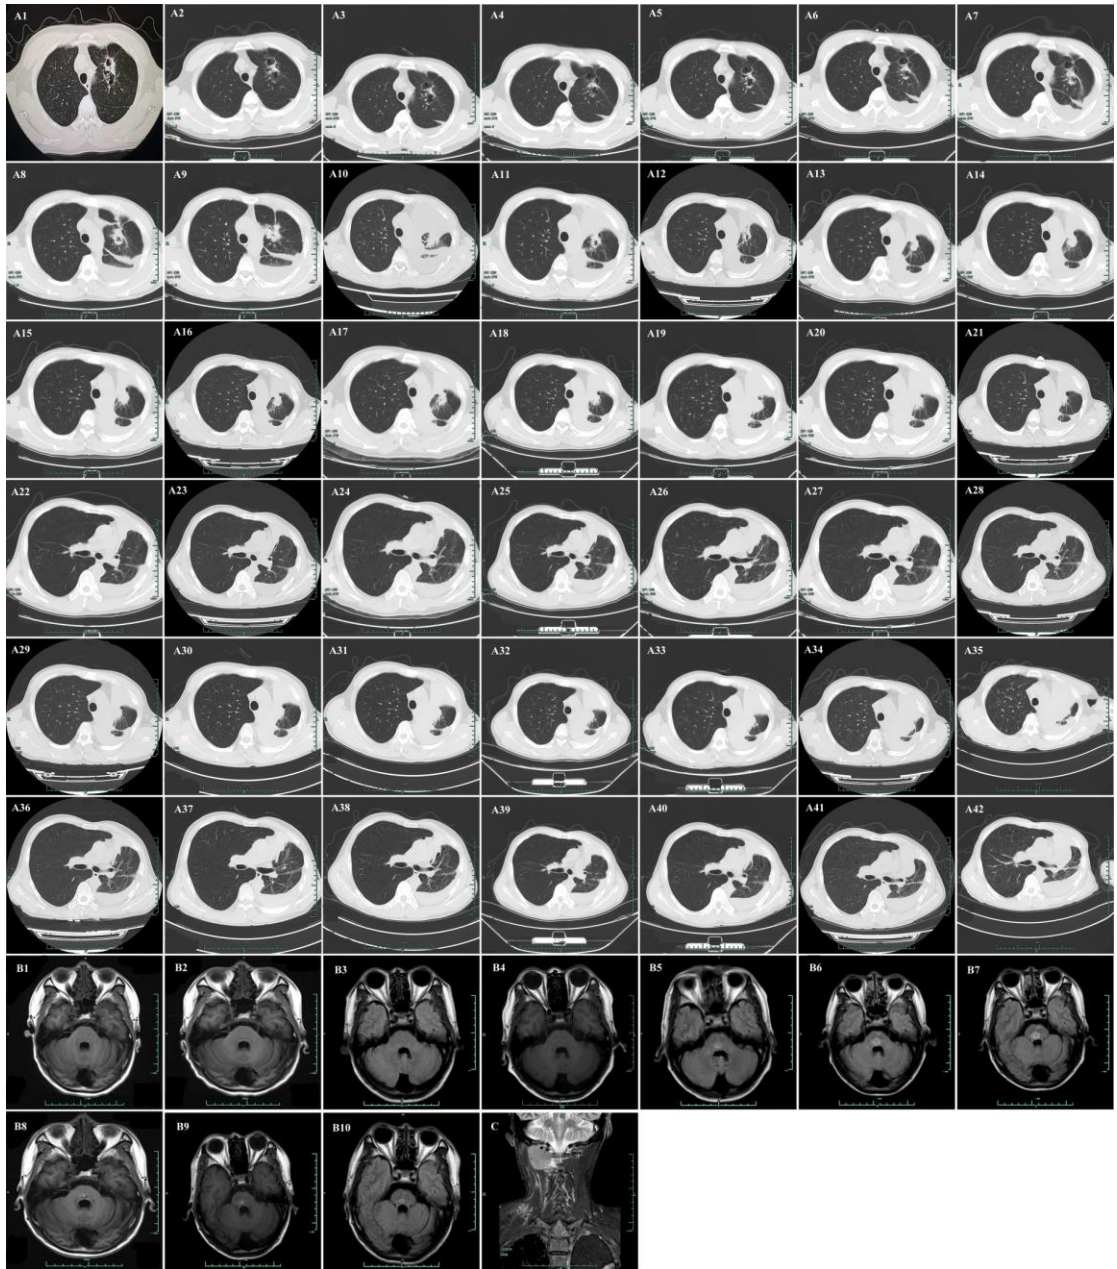

Supplement: Supplementary file 1 [file get_supplementary_file.php]
